# Supplementary material for: Antibacterial Activity of Biodegradable Films Incorporated with Biologically-Synthesized Silver Nanoparticles and the Evaluation of Their Migration to Chicken Meat
Source: MDPI journal article supplement (doi:10.3390/antibiotics12010178), 2023-01-15
Supplement: s1 [file s1]

Supplementary Table S1. Antibiotics resistance of *Salmonella* sp. isolates from poultry farms.

| Bacteria          | Resistance                                       |
|-------------------|--------------------------------------------------|
| S. Saint Paul 08  | AMP, PEN, ERY, OXA                               |
| S. Saint Paul 09  | AMP, PEN, ERY, OXA, AMX, CEF, CET, CRO, CFZ, CTX |
| S. Saint Paul 10  | AMP, PEN, ERY, OXA, NAL, AMX, CEF, CFZ, FOX      |
| S. Saint Paul 11  | NAL, PEN, ERY, OXA                               |
| S. Saint Paul 12  | AMP, PEN, ERY, OXA, AMX, CEF, CET, CRO, CFZ, CTX |
| S. Saint Paul 13  | ERY, OXA                                         |
| S. Enteritidis 92 | NAL, CHL                                         |
| S. Enteritidis 02 | NAL, ERY, OXA                                    |
| S. Enteritidis 06 | AMP, PEN, NAL, ERY, OXA                          |
| S. Seftenberg 14  | NAL, ERY, OXA                                    |
| S. Seftenberg 15  | NAL, ERY, OXA, AMX, CET, CRO, CFZ, CTX           |
| S. Seftenberg 16  | NAL, ERY, OXA                                    |
| S. Seftenberg 17  | NAL, ERY, OXA                                    |
| S. Seftenberg 18  | NAL, ERY, OXA                                    |
| S. Seftenberg 19  | PEN, NAL, ERY, OXA                               |
| S. Kentucky 20    | AMP, PEN, NAL, ERY, OXA                          |
| S. Kentucky 21    | PEN, NAL, ERY, OXA                               |
| S. Kentucky 22    | PEN, NAL, ERY, OXA                               |
| S. Kentucky 25    | PEN, NAL, ERY, OXA                               |

AMP- ampicillin; AMX – amoxicillin; CEF – cephalothin; CET – ceftiofur; CFZ – cefazolin; CHL- chloramphenicol; CRO- ceftriaxone; CTX – cefotaxime; ERY – erythromycin; FOX – ceftiofur; NAL - nalidixic acid; OXA – oxacillin; PEN – penicillin.
